# Supplementary material for: Characterization of palladium species after γ-irradiation of a TBP–alkane–Pd(NO3)2system
Source: Royal Society of Chemistry journal article supplement (doi:10.1039/c8ra02695e), 2018-01-01
Supplement: c8ra02695e1.pdf [file c8ra02695e1.pdf]

## SUPPORTING INFORMATION

### Characterization of palladium species in the after $\gamma$ -irradiation of a TBP-alkane- $\text{Pd}(\text{NO}_3)_2$ system

Bénédicte SIMON<sup>a</sup>, Christine BOUYER<sup>\*a</sup>, Stéphanie DE SIO<sup>b</sup>, Claude BERTHON<sup>a</sup>, Nathalie BOUBALS<sup>a</sup>, Frédéric MISERQUE<sup>c</sup>, Emmanuelle BRACKX<sup>a</sup>, Nicole RAYMOND<sup>a</sup>, Alexandre CHAGNES<sup>d</sup>, Laurence BERTHON<sup>a</sup>

---

<sup>a.</sup> CEA Marcoule, Nuclear Energy Division, Research Department on Mining and Fuel Recycling Processes (DMRC), BP17171, 30207 Bagnols-sur-Cèze Cedex, France.

<sup>b.</sup> ORANO Cycle, 1 Place Jean Millier, 92084 Paris La Défense.

<sup>c.</sup> DEN, Service de Corrosion et d'étude du Comportement des Matériaux dans leur Environnement (SCCME), CEA, Université Paris-Saclay, 91191, Gif-sur-Yvette, France.

<sup>d.</sup> Université de Lorraine, CNRS, GeoRessources, F- 54000 Nancy, France.

\*corresponding author: [christine.bouyer@cea.fr](mailto:christine.bouyer@cea.fr)

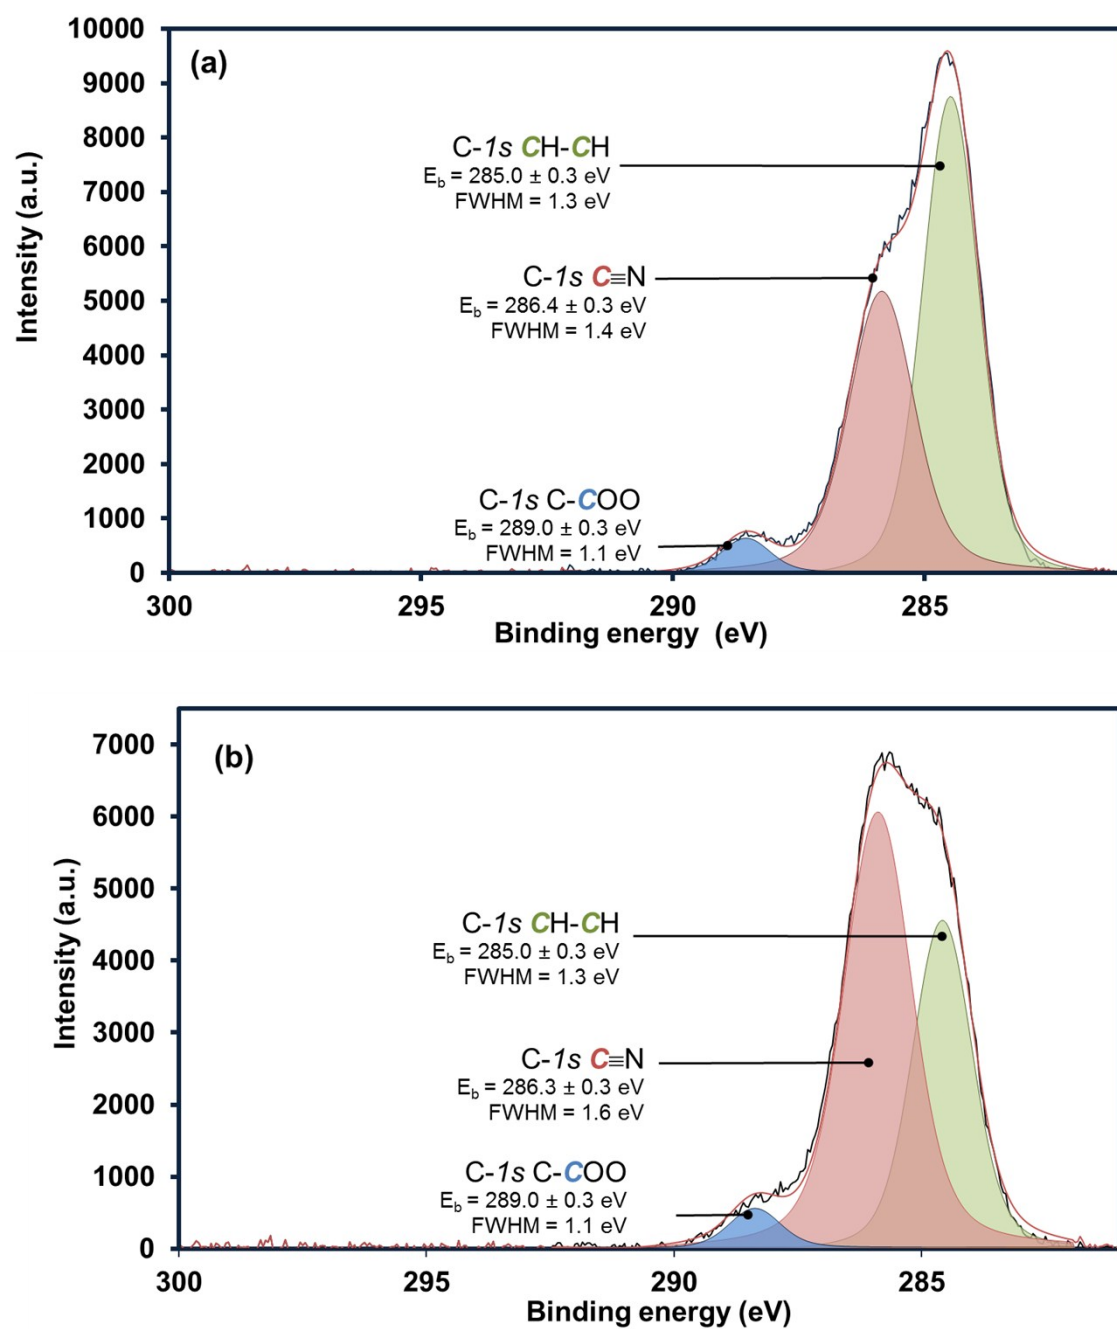

Figure S1: XPS core level spectra C-1s for (a)  $\Phi_{s,1}$  and (b)  $\Phi_{s,2}$ .

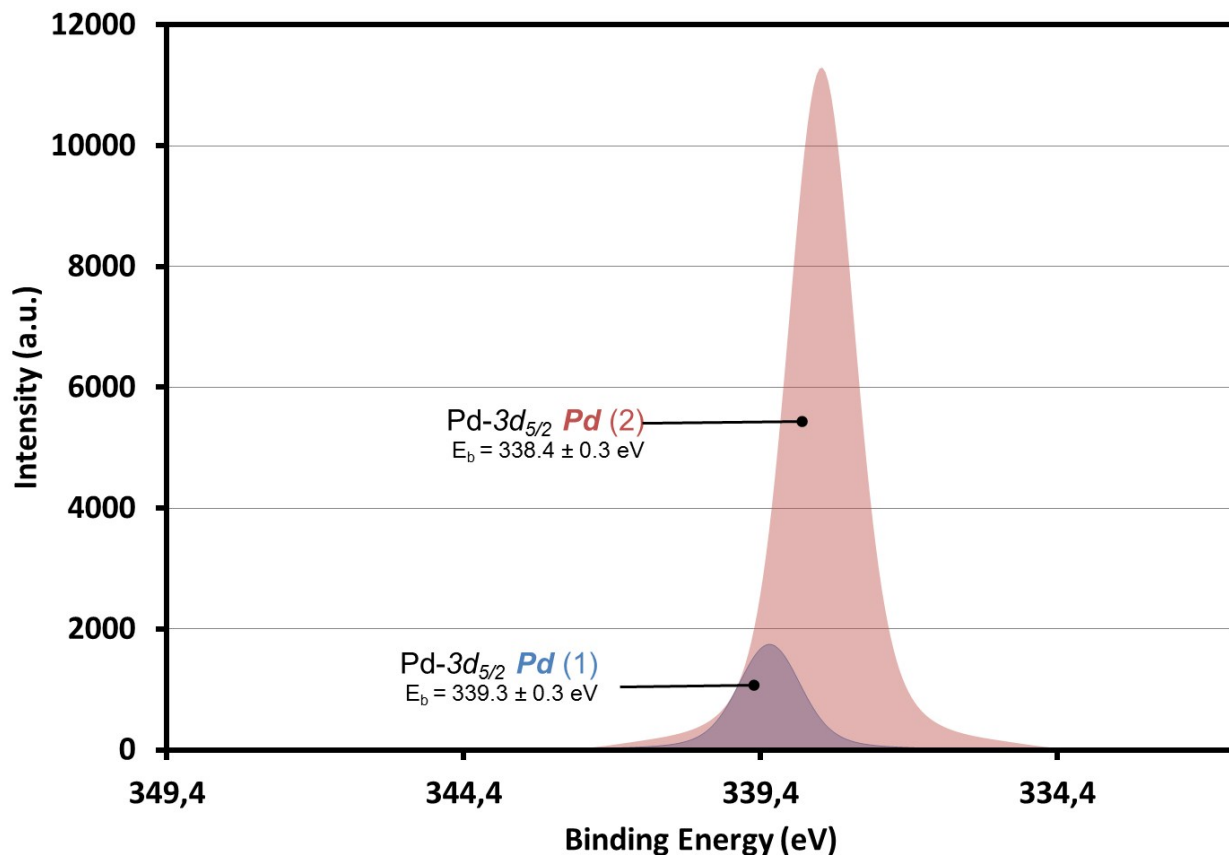

Figure S2: XPS core level spectra Pd3d<sub>5/2</sub> for  $\Phi_{s,3}$  obtained after a partial dissolution of  $\Phi_{s,1}$  in 1 mol.L<sup>-1</sup>NH<sub>3</sub> (solid/liquid ratio= 9; dissolution time=15 minutes).

XPS spectra shows Pd-CN contribution disappears after  $\Phi_{s,1}$  dissolution in 1 mol.L<sup>-1</sup> NH<sub>3</sub> at a solid:liquid ratio of 9 during 15 minutes. In this case, two peaks are observed for  $\Phi_{s,3}$  (Figure S2) with a lower binding energy value for the main contribution of Pd (338.4 instead of 338.7 eV). Furthermore, the area of the peak attributed to Pd linked to -C≡N at 339.3 eV is relatively small and close to the detection limit.

$^{31}\text{P}$  NMR spectra decoupled of  $^1\text{H}$  spectrum was done on  $\Phi_{\text{S},2}$ . This experiment allows determining the number of different phosphorous compounds present in the precipitate. For  $\Phi_{\text{S},2}$ , the value is 2 (Figure S1 (b)). The  $^{31}\text{P}$  spectra coupled with  $^1\text{H}$  (Figure S3 (a)) gives information on the number of  $-\text{CH}_2$  two bonds far from the phosphorous atoms. The peak observed at -0.8 ppm is a septuplet and -1.2 ppm is a quintuplet (Figure S3 (a)). Based on the literature<sup>70</sup>, these two peaks are assigned respectively to TBP and HDBP molecules. This is consistent with the  $^1\text{H}$  integration rates showing the TBP is the main compound while the HDBP (the degradation product) is growing. The 2D  $^{31}\text{P} - ^1\text{H}$  spectrum based on the CIGARAD pulse sequence (for  $^{31}\text{P}$  2 to 4 bounds far from  $^1\text{H}$  nuclei) allows attributing the  $^1\text{H}$  observed to the butyl chain of TBP or HDBP (Figure S2).

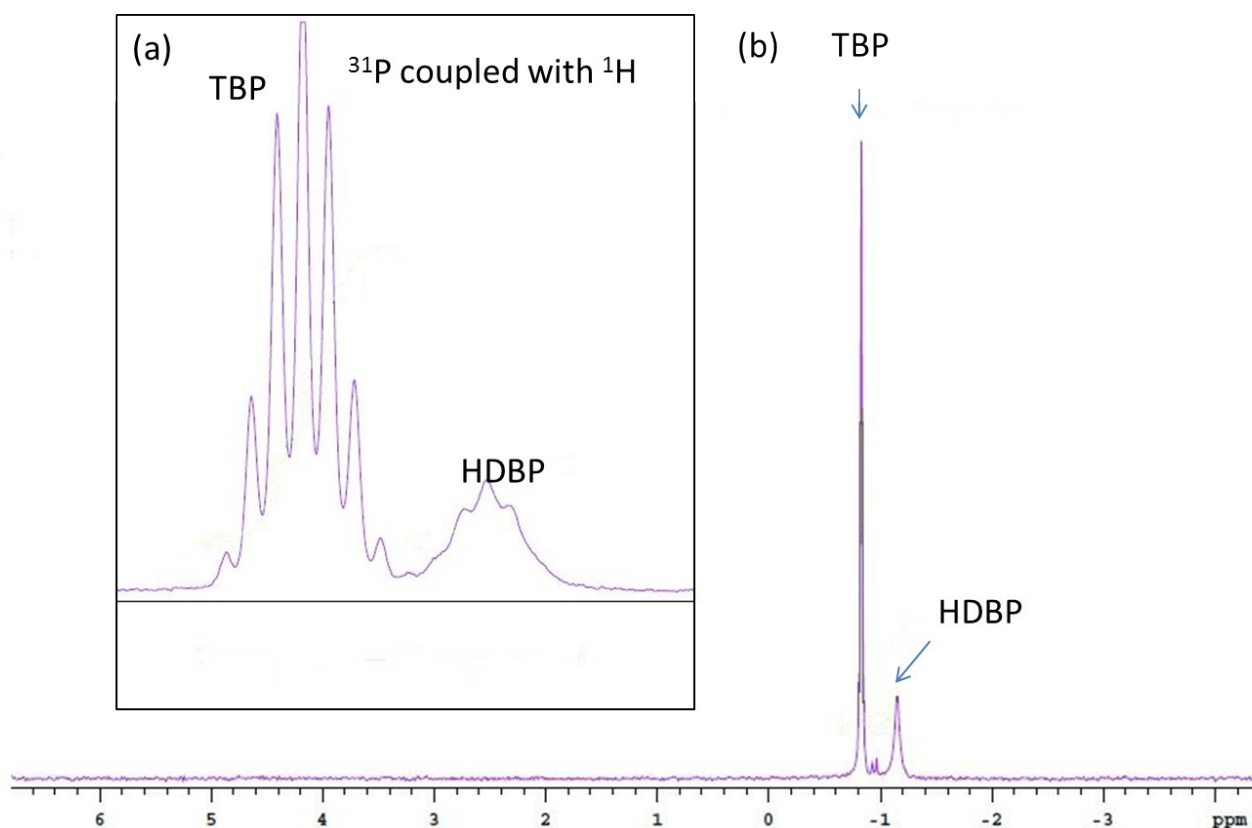

Figure S3: 1D NMR spectrum (a)  $^{31}\text{P}$  coupled with  $^1\text{H}$  and (b) of  $^{31}\text{P}$  decoupled of  $^1\text{H}$  for  $\Phi_{\text{S},2}$  partially dissolved in DMSO-D6 with  $m(\Phi_{\text{S},2}) = 9.8 \text{ mg}$  in  $650\mu\text{L}$  of DMSO-D6) ( $\text{S/L} = 15.07 \text{ g of precipitate /L of solvent}$ ).

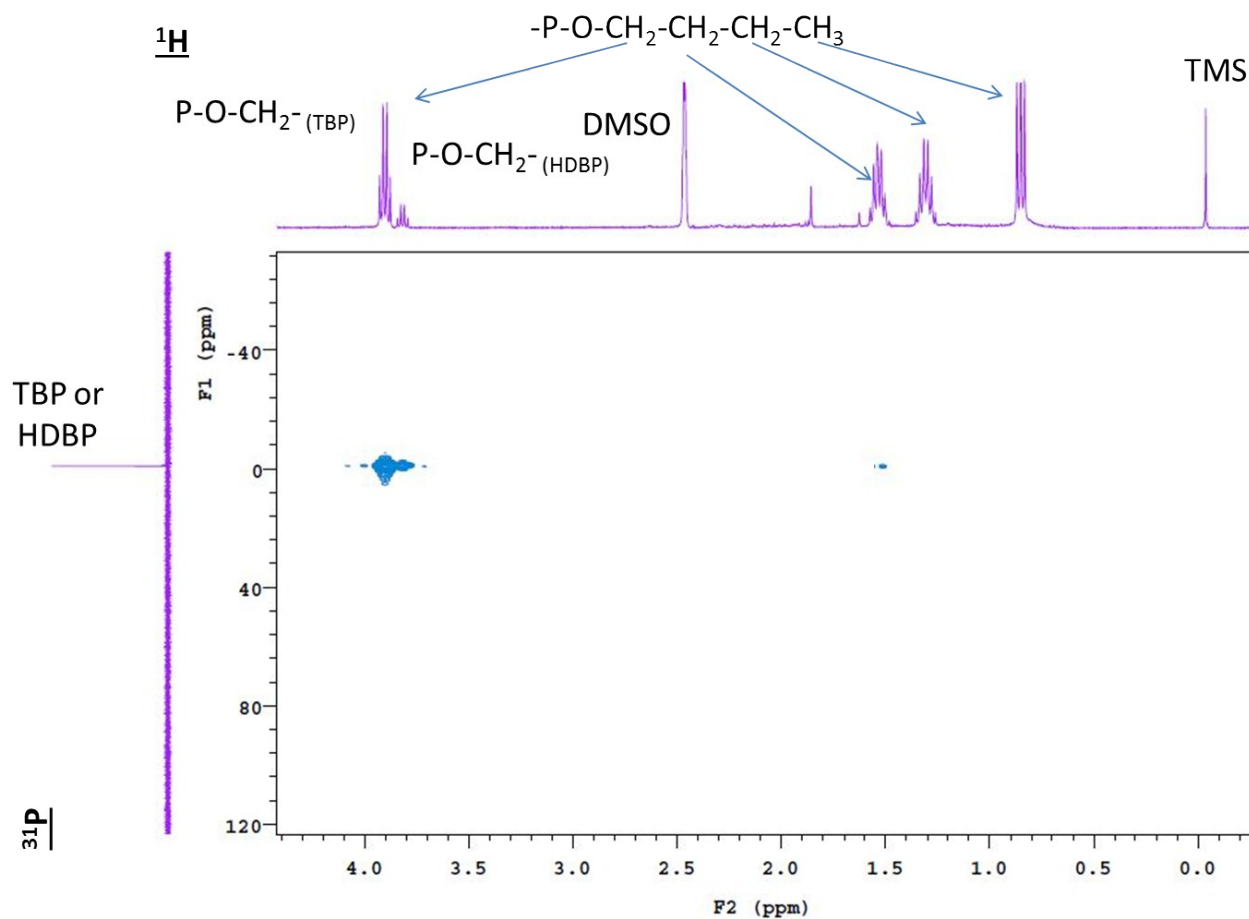

Figure S4: 2D  $^{31}\text{P}$  –  $^1\text{H}$  NMR spectrum of  $\Phi_{\text{S},2}$  partially dissolved in DMSO-D6 ( $m_{\Phi_{\text{S},2}} = 9.8$  mg of  $\Phi_{\text{S},2}$  in 650  $\mu\text{L}$  of DMSO-D6 at  $\text{S/L} = 15.07$  g of precipitate /L of solvent).

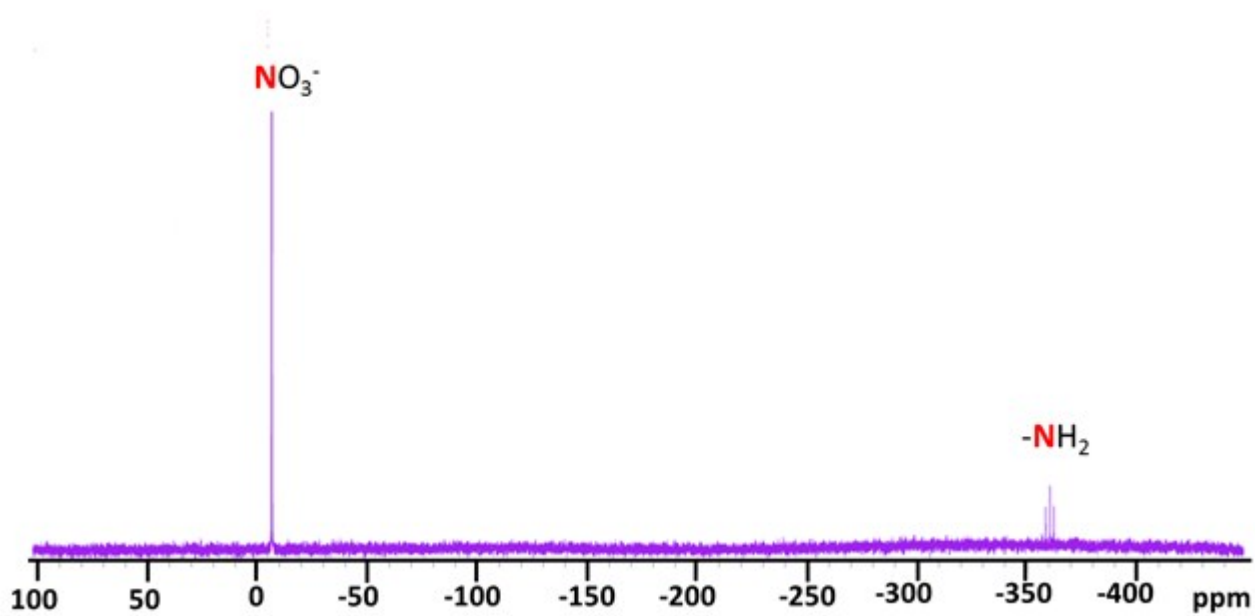

Figure S5:  $^{15}\text{N}$  NMR spectrum of an aqueous phase of  $3 \text{ mol.L}^{-1} \text{HNO}_3$  containing palladium(II) nitrate ( $5 \text{ g.L}^{-1}$  of Pd) and  $\text{Na}^{15}\text{NO}_3$  ( $66 \text{ g/L}$ ) (98 % atomic of  $^{15}\text{N}$ ) in contact with 30%<sub>vol.</sub> TBP diluted in TPH after  $\gamma$ -irradiation at 500 kGy (dose rate= 5 kGy/h).

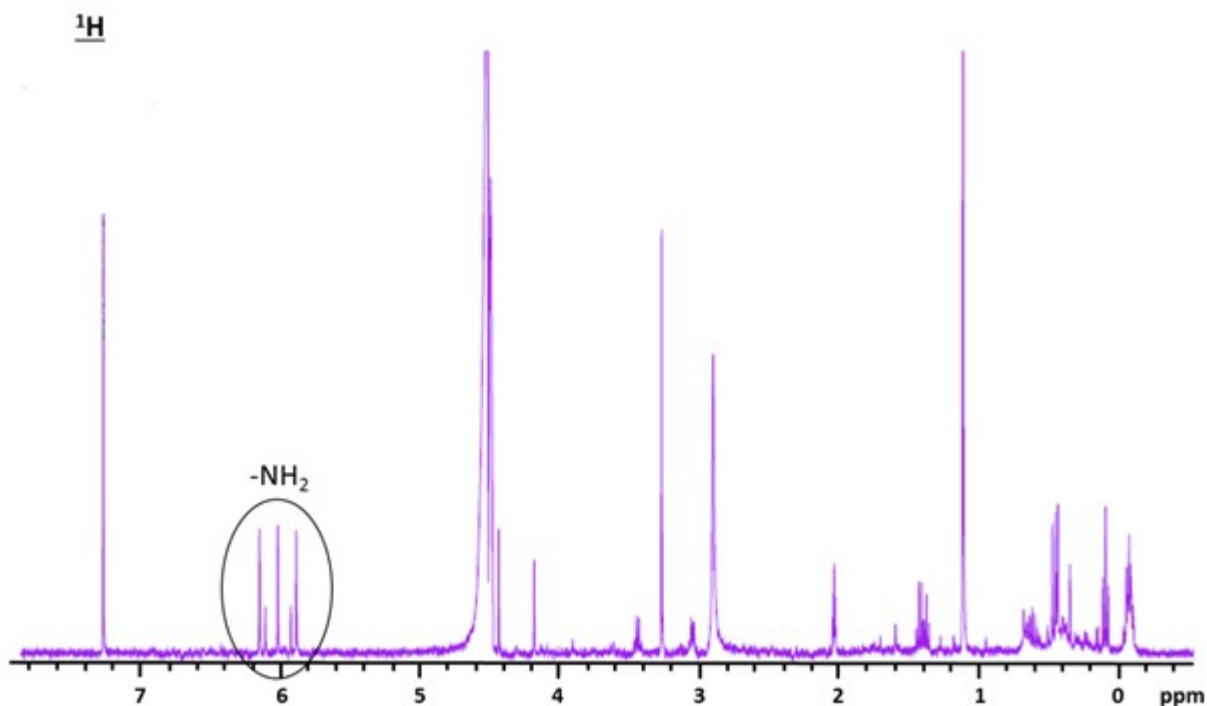

Figure S6:  $^1\text{H}$  NMR spectrum of an aqueous phase of  $3 \text{ mol.L}^{-1} \text{H}^{14}\text{NO}_3$  in the presence of palladium(II) nitrate ( $\text{Pd } 5 \text{ g.L}^{-1}$ ) and  $\text{Na}^{15}\text{NO}_3$  ( $66 \text{ g/L}$ ) (98 % atomic of  $^{15}\text{N}$ ) in contact with 30%<sub>vol.</sub> TBP diluted in TPH after  $\gamma$ -irradiation at 500 kGy .

A mixture of  $^{14}\text{N}$  and  $^{15}\text{N}$  is present in the aqueous nitric acid ( $\text{H}^{14}\text{NO}_3$ ) solution containing palladium(II) nitrate and sodium nitrite ( $\text{Na}^{15}\text{NO}_3$ ). A triplet attributed to  $^{14}\text{N}$  is observed around 6 ppm and a doublet attributed to  $^{15}\text{N}$  is observed in the same region. The presence of proton in the region can be characteristic of amine ( $-\text{NH}_2$ ).

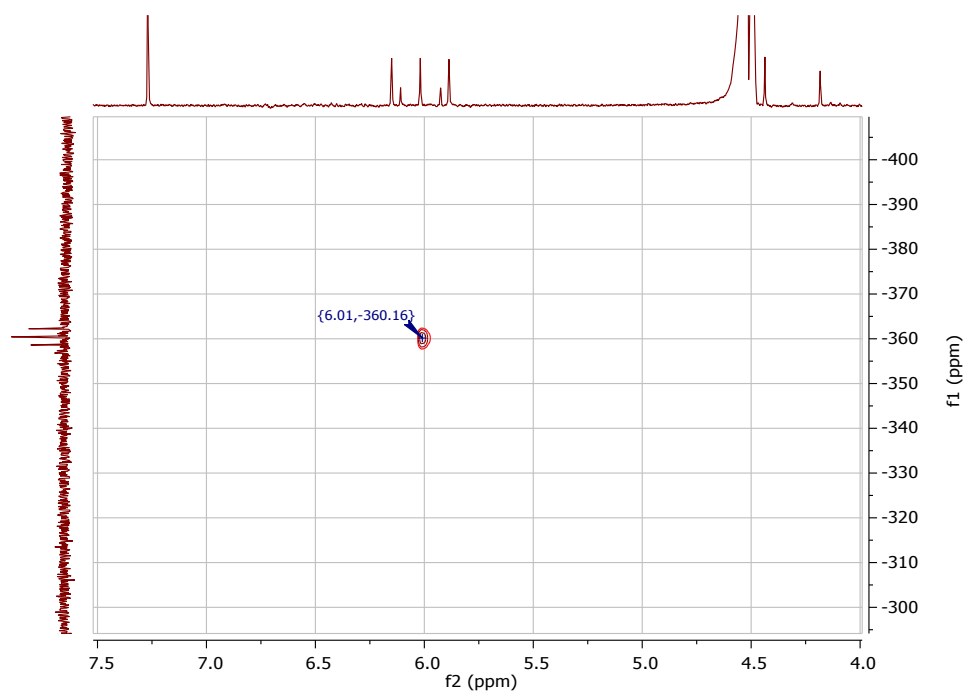

Figure S7: gHSQCAD  $^{15}\text{N}$ - $^1\text{H}$  spectra of the an aqueous phase containing  $\text{H}^{14}\text{NO}_3$  enriched with  $^{15}\text{N}$  ( $\text{Na}^{15}\text{NO}_3$  – 66 g/L) in the presence of palladium(II) nitrate ( $5 \text{ g}\cdot\text{L}^{-1}$  of Pd) in DMSO- $\text{D}_6$ .  $^{15}\text{N}$  reference scale is  $\text{CH}_3\text{NO}_2$  and  $^1\text{H}$  reference scale is TMS.

A mixture of  $^{14}\text{N}$  and  $^{15}\text{N}$  is present in the aqueous nitric acid ( $\text{H}^{14}\text{NO}_3$ ) solution containing palladium(II) nitrate and sodium nitrate ( $\text{Na}^{15}\text{NO}_3$ ). Consequently, the triplet is assigned to  $^{14}\text{N}$ - $^1\text{H}$  coupling around 6 ppm while the doublet is assigned to  $^{15}\text{N}$ - $^1\text{H}$  coupling. The observed  $^{15}\text{N}$  chemical shift at about 360 ppm is consistent with an amine ( $-\text{NH}_2$ ) group (Figure S7).
